# Supplementary material
Source: PubMed Central journal article supplement (PMC6312107)
Supplement: NIHMS964308-supplement-Supp_Fig_1.pdf [file NIHMS964308-supplement-Supp_Fig_1.pdf]

Figure 2a

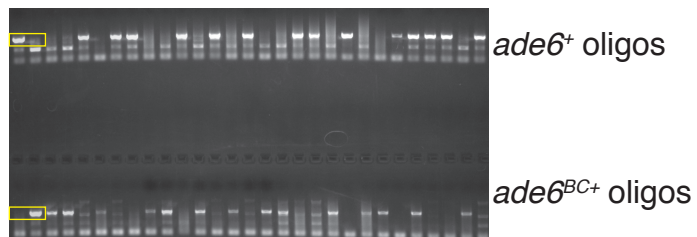

ED Figure 4a

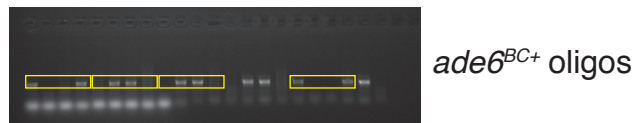

Figure 3a

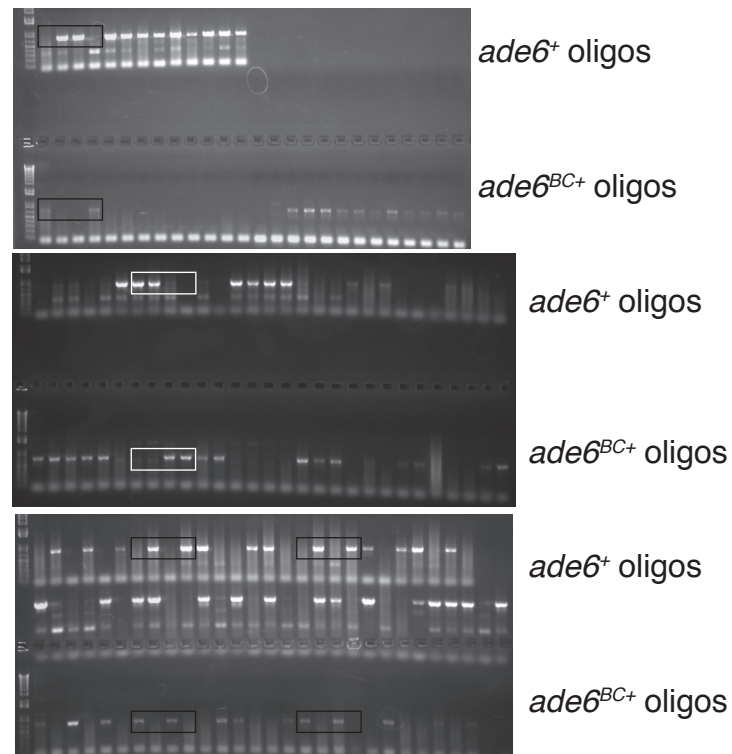

**Supplementary Figure 1.** Uncropped PCR genotyping gels from the indicated Figures. Gels were stained with ethidium bromide.
